# Supplementary material for: Preparation of high adsorption performance and stable biochar granules by FeCl3-catalyzed fast pyrolysis
Source: Royal Society of Chemistry journal article supplement (doi:10.1039/c5ra22870k), 2016-01-01
Supplement: c5ra22870k1.pdf [file c5ra22870k1.pdf]

**Preparation of High Adsorption Performance and Stable Biochar Granules by  
FeCl<sub>3</sub>-Catalyzed Fast Pyrolysis**

De-Chang Li,<sup>a</sup> Jin-Wen Ding,<sup>b</sup> Ting-Ting Qian,<sup>a</sup> Shun Zhang<sup>a</sup> and Hong Jiang<sup>a\*</sup>

<sup>a</sup>CAS Key Laboratory of Urban Pollutant Conversion, Department of Chemistry,  
University of Science and Technology of China, Hefei 230026, China

<sup>b</sup>CAS Key Laboratory of Materials for Energy Conversion, Department of Materials  
Science and Engineering, University of Science and Technology of China, Hefei  
230026, China

\* Corresponding author: Dr. Hong Jiang

E-mail: [jhong@ustc.edu.cn](mailto:jhong@ustc.edu.cn)

**R<sub>ss</sub> determination.** To confirm the accuracy of scatter ratio (SR), concentrations of suspended substance (R<sub>ss</sub>) under the same conditions as the SR determination experiment were determined and calculated according to the following equation.

$$R_{ss} = \frac{M_{ss}}{V}$$

As shown in the Table S6, the mass distributed in solution (M<sub>ss</sub>) is approximate to that of the decreased mass of GBC (M<sub>0</sub>-M), which means that both SR and R<sub>ss</sub> are suitable indexes for the stability of GBCs. Considering the GBC remainder is easier to separate for determination, we decided to employ scatter ratio (SR) to examine the physical stability of GBC.

**XPS analysis.** The main functional groups and relative peak area percentages of C and O are listed in Table S2. The main functional groups containing O are C–O (533.0 eV) and silicon-oxygen bond (531.8 eV, 532.4 eV) for both GBCs. The peak at 531.2 eV which can be assigned to Al<sub>2</sub>O<sub>3</sub> or FeOOH gets stronger after FeCl<sub>3</sub> doping.<sup>S1</sup>

**Table S1.** Components of the kaolin used in this work.

| Component         | SiO <sub>2</sub> | Al <sub>2</sub> O <sub>3</sub> | K <sub>2</sub> O | Na <sub>2</sub> O | Fe <sub>2</sub> O <sub>3</sub> | MgO  | CaO  | TiO <sub>2</sub> |
|-------------------|------------------|--------------------------------|------------------|-------------------|--------------------------------|------|------|------------------|
| Content<br>(%,wt) | 47.73            | 43.36                          | 3.75             | 2.04              | 1.24                           | 0.89 | 0.15 | 0.31             |

**Table S2.** Physical characteristics of Fe<sub>0</sub>-GBC<sub>650</sub> and Fe<sub>5</sub>-GBC<sub>650</sub>.

| Sample                              | BET surface area<br>m <sup>2</sup> /g | Pore volume<br>cm <sup>3</sup> /g | Average pore<br>width<br>Å |
|-------------------------------------|---------------------------------------|-----------------------------------|----------------------------|
| Fe <sub>0</sub> -GBC <sub>650</sub> | 38.46                                 | 0.0302                            | 31.40                      |
| Fe <sub>5</sub> -GBC <sub>650</sub> | 78.62                                 | 0.0543                            | 27.65                      |

**Table S3.** Curve fitting results of XPS C 1s and O 1s spectra of GBCs.

| Element<br>s | Fe <sub>0</sub> -GBC <sub>650</sub> |               |                           | Fe <sub>5</sub> -GBC <sub>650</sub>       |               |                           |
|--------------|-------------------------------------|---------------|---------------------------|-------------------------------------------|---------------|---------------------------|
|              | Groups                              | B. E.<br>(eV) | Area<br>percentage<br>(%) | Groups                                    | B. E.<br>(eV) | Area<br>percentage<br>(%) |
| C 1s         | C=C                                 | 284.3         | 15.45                     | C=C                                       | 284.3         | 21.01                     |
|              | Graphite                            | 284.8         | 31.11                     | Graphite C                                | 284.8         | 15.67                     |
|              | C                                   |               |                           |                                           |               |                           |
|              | C–C                                 | 285.2         | 32.33                     | C–C                                       | 285.3         | 32.79                     |
|              | C–O                                 | 286.7         | 21.11                     | C–O                                       | 286.7         | 30.52                     |
| O 1s         | Al <sub>2</sub> O <sub>3</sub>      | 531.2         | 10.64                     | Al <sub>2</sub> O <sub>3</sub> /FeOO<br>H | 531.2         | 18.53                     |
|              | SiO <sub>3</sub> <sup>2-</sup>      | 531.8         | 19.86                     | SiO <sub>3</sub> <sup>2-</sup>            | 531.9         | 23.44                     |
|              | SiO <sub>2</sub>                    | 532.4         | 26.11                     | SiO <sub>2</sub>                          | 532.4         | 24.47                     |
|              | C–O                                 | 533.0         | 26.11                     | C–O                                       | 533.0         | 21.54                     |
|              | O–C=O                               | 533.6         | 17.28                     | O–C=O                                     | 533.6         | 12.02                     |
|              |                                     |               |                           |                                           |               |                           |

**Table S4.** Summary of 4-CP adsorption capacities of various adsorbents.

| Adsorbent                                      | 4-CP adsorption capacity<br>(mg/g) | Reference        |
|------------------------------------------------|------------------------------------|------------------|
| Activated carbon                               | 412                                | S2               |
| Biosolid biochar                               | ~45                                | S3               |
| Granular activated carbon                      | 200                                | S3               |
| Rice straw biochar                             | ~10                                | S3               |
| Fallen leaves biochar                          | ~10                                | S3               |
| Rice straw biochar                             | ~25                                | S4               |
| Granular activated carbon                      | ~80                                | S5               |
| Activated carbon                               | 188.7                              | S6               |
| Biochar in Fe <sub>5</sub> -GBC <sub>650</sub> | 250.0                              | <b>This work</b> |

**Table S5.** Biochar production rates of GBCs prepared with different FeCl<sub>3</sub> dosages.

| Sample                              | Yield (%) |
|-------------------------------------|-----------|
| Fe <sub>0</sub> -GBC <sub>650</sub> | 20.6      |
| Fe <sub>1</sub> -GBC <sub>650</sub> | 30.4      |
| Fe <sub>3</sub> -GBC <sub>650</sub> | 48.9      |
| Fe <sub>5</sub> -GBC <sub>650</sub> | 52.2      |

**Table S6.** Related data on R<sub>SS</sub> and SR determination.

|                                     | M <sub>0</sub><br>(mg) | M<br>(mg) | M <sub>SS</sub><br>(mg) | M <sub>0</sub> -M<br>(mg) | R <sub>SS</sub><br>(mg/L) | SR<br>(%) |
|-------------------------------------|------------------------|-----------|-------------------------|---------------------------|---------------------------|-----------|
| Fe <sub>0</sub> -GBC <sub>650</sub> | 270.3                  | 138.5     | 129.3                   | 131.8                     | 4310.0                    | 48.8      |
|                                     | 267.4                  | 154.1     | 111.7                   | 113.3                     | 3723.3                    | 42.4      |
|                                     | 270.2                  | 142.0     | 128.6                   | 128.2                     | 4286.7                    | 47.4      |
| Fe <sub>5</sub> -GBC <sub>650</sub> | 306.7                  | 302.4     | 6.3                     | 4.3                       | 210                       | 1.4       |
|                                     | 311.2                  | 299.9     | 13.0                    | 11.3                      | 433.3                     | 3.6       |
|                                     | 310.6                  | 303.1     | 8.6                     | 7.5                       | 286.7                     | 2.4       |

**Table S7.** Scatter ratios of GBCs in different pH aqueous systems.

| Sample                              | pH  | SR (%) | Sample                              | pH  | SR (%) |
|-------------------------------------|-----|--------|-------------------------------------|-----|--------|
| Fe <sub>0</sub> -GBC <sub>650</sub> | 5.0 | 45.61  | Fe <sub>5</sub> -GBC <sub>650</sub> | 5.0 | 2.76   |
| Fe <sub>0</sub> -GBC <sub>650</sub> | 6.0 | 45.96  | Fe <sub>5</sub> -GBC <sub>650</sub> | 6.0 | 2.86   |
| Fe <sub>0</sub> -GBC <sub>650</sub> | 7.0 | 44.97  | Fe <sub>5</sub> -GBC <sub>650</sub> | 7.0 | 2.50   |
| Fe <sub>0</sub> -GBC <sub>650</sub> | 8.0 | 45.01  | Fe <sub>5</sub> -GBC <sub>650</sub> | 8.0 | 2.34   |
| Fe <sub>0</sub> -GBC <sub>650</sub> | 9.0 | 45.20  | Fe <sub>5</sub> -GBC <sub>650</sub> | 9.0 | 2.93   |

**Table S8.** Compressive strengths of different kind of GBCs.

| Sample                                                     | Average maximum compressive load (N) | Average maximum compressive stress (MPa) |
|------------------------------------------------------------|--------------------------------------|------------------------------------------|
| Fe <sub>0</sub> -GBC <sub>500</sub>                        | 12.29                                | 1.12                                     |
| Fe <sub>5</sub> -GBC <sub>650</sub>                        | 49.97                                | 4.86                                     |
| NaCl-GBC <sub>650</sub>                                    | 9.43                                 | 0.79                                     |
| Fe(NO <sub>3</sub> ) <sub>3</sub> -GBC <sub>650</sub>      | 4.72                                 | 0.43                                     |
| NaCl-Fe(NO <sub>3</sub> ) <sub>3</sub> -GBC <sub>650</sub> | 28.56                                | 2.51                                     |

## References

- S1 X. Zhu, Y. Liu, C. Zhou, S. Zhang and J. Chen, *ACS Sustain. Chem. Eng.*, 2014, **2**, 969-977.
- S2 V. M. Monsalvo, A. F. Mohedano and J. J. Rodriguez, *Desalination*, 2011, **277**, 377-382.
- S3 S.-Y. Oh and Y.-D. Seo, *Environ. Sci. Pollut. Res.*, 2015, 1-11.
- S4 Y.-h. Shih, Y.-f. Su, R.-y. Ho, P.-h. Su and C.-y. Yang, *Sci. Total. Environ.*, 2012, **433**, 523-529.
- S5 O. Hamdaoui and E. Naffrechoux, *Ultrason. Sonochem.*, 2009, **16**, 15-22.
- S6 B. H. Hameed, L. H. Chin and S. Rengaraj, *Desalination*, 2008, **225**, 185-198.

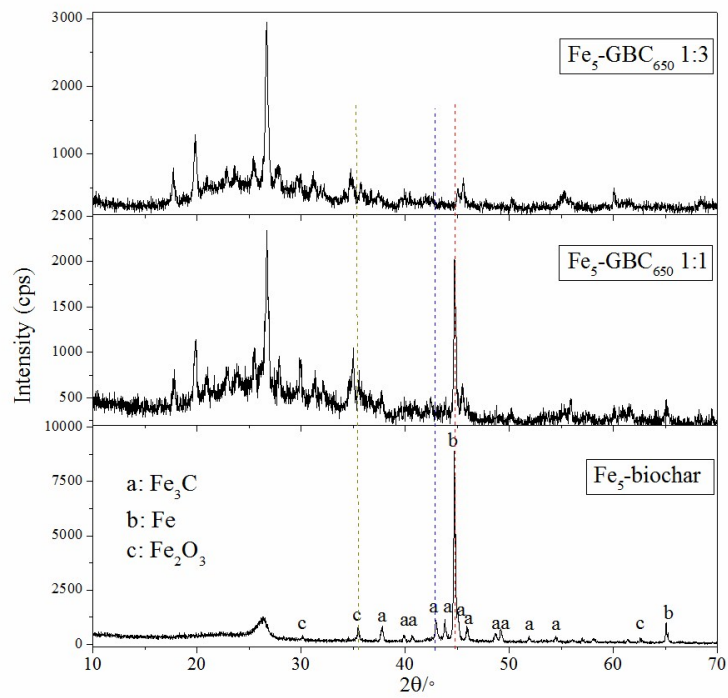

**Figure S1.** XRD results of GBCs with different mass ratios between kaolin and sawdust.

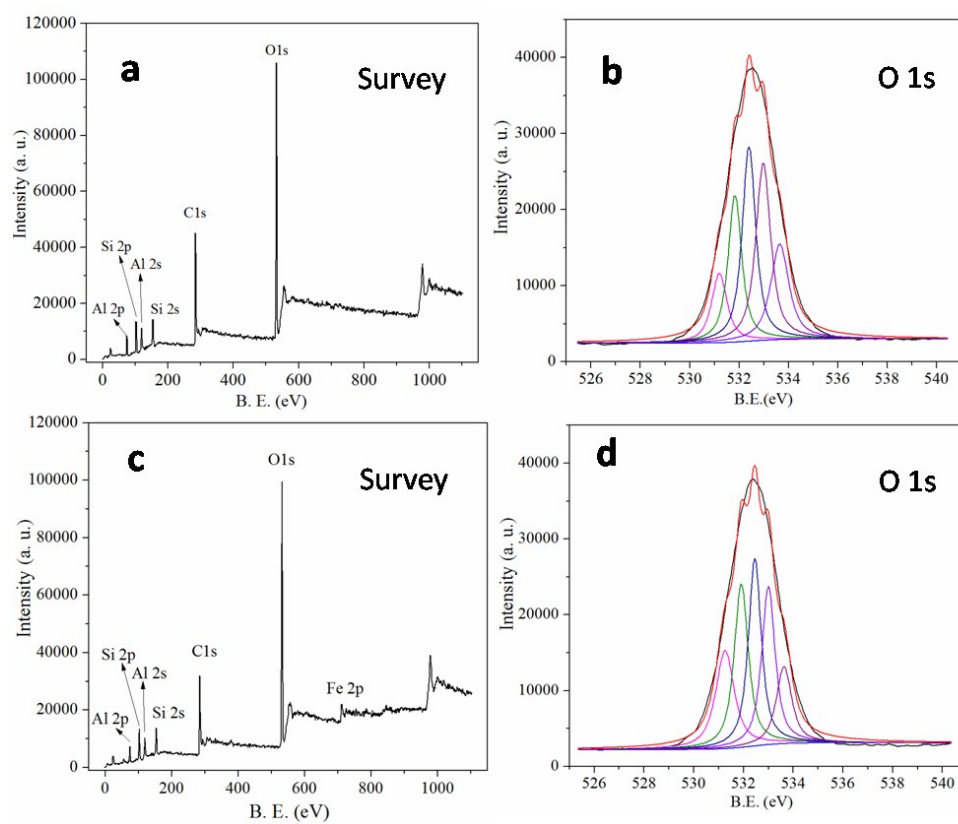

**Figure S2.** a,b) XPS results of  $\text{Fe}_0\text{-GBC}_{650}$ ; c,d) XPS results of  $\text{Fe}_5\text{-GBC}_{650}$ .

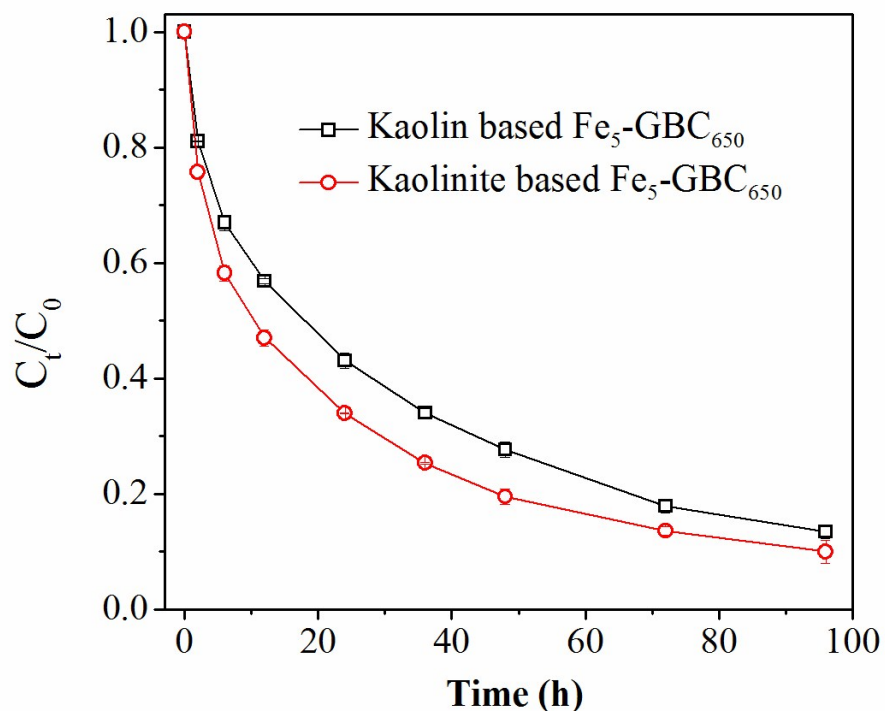

**Figure S3.** Comparison of kaolin-based and kaolinite-based  $\text{Fe}_5\text{-GBC}_{650}$  on 4-CP adsorption.



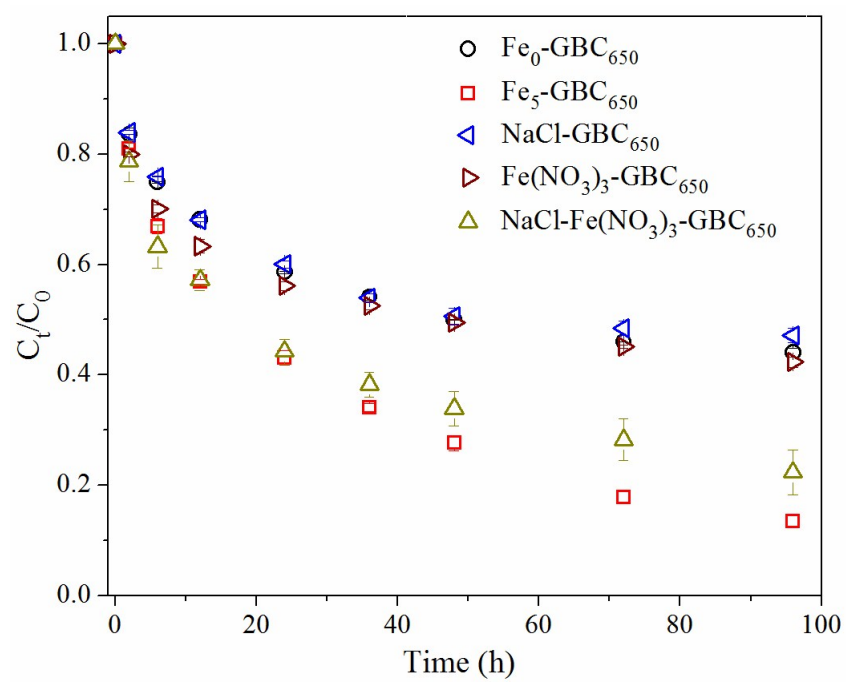

**Figure S4.** Performance of different adsorbents on 4-CP adsorption

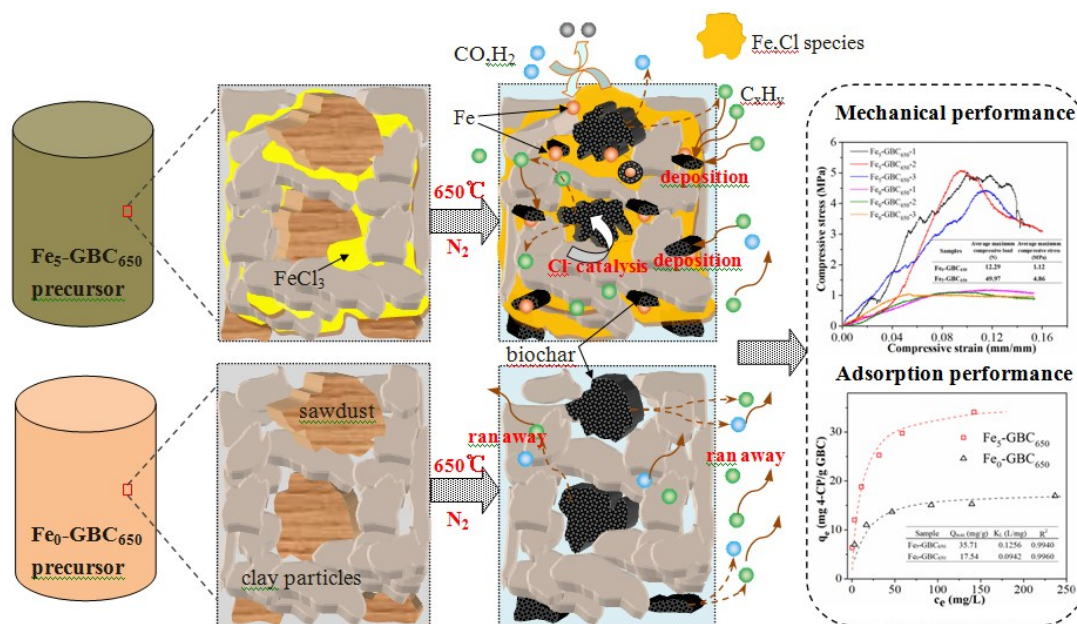

**Figure S5.** Schematic for work mechanism of  $\text{FeCl}_3$  to enhance the sorption of 4-CP and mechanical performance.
